# Supplementary material
Source: HighWire-hosted journal article supplement (doi:10.1101/rna.080426.125)
Supplement: Supplemental_Legends.docx [file Supplemental_Legends.docx]

**Supplemental Figure Legends**

Figure S1. AGO2 does not regulate AGO1 mRNA and protein stabilities. Related to Fig. 1

1. qRT-PCR of AGO1 mRNA in the WT and *AGO2Δ* mESCs.
2. qRT-PCR of AGO1 mRNA in the WT mESCs expressing a vector or AGO2.
3. AGO1 protein stability measurement in the WT and *AGO2Δ* mESCs.
4. AGO1 protein stability measurement in the WT mESCs expressing a vector or AGO2.

Data information: In C and D, representative Western blots are shown. All the quantifications represent the means (± SD) of three independent experiments. Beta-TUBULIN levels were used for normalization in calculating the relative protein levels. One-Way ANOVA was used to determine the significance of the difference, n.s. not significant (p > 0.05).

Figure S2. Reads from ribosome profiling in mESCs at the *AGO1* locus.Related to Fig. 1.

1. The reads from ribosome profiling in mESCs mapped to the *AGO1* locus
2. The reads from ribosome profiling in mESCs mapped to around the stop codon of *AGO1* mRNA.

Figure S3. AGO2 binds to *AGO1* mRNA in a let-7 miRNA dependent fashion. Relative to Fig. 1.

1. Outline of the CLIP-qRT-PCR to examine the mRNAs bound by AGO2 in the WT, *let-7Δ,* and AGO1 3’UTR mutant mESCs.
2. qRT-PCR was performed for the indicated mRNAs isolated from the anti-AGO2 or IgG immunoprecipitations in the WT, *let-7Δ,* and AGO1 3’UTR mutant mESCs. The mRNA signals from IgG in the WT mESCs were set as 1 for relative quantifications. The results represent the means (± SD) of three independent experiments. One-Way ANOVA was used to determine the significance of the difference, * p < 0.05.

Table S1. qPCR primers and sgRNAs used in this study.
