# Supplementary material
Source: HighWire-hosted journal article supplement (doi:10.1101/rna.080426.125)
Supplement: Supplemental_Table_S1.xlsx [file Supplemental_Table_S1.xlsx]

## Sheet: Cell lines
Cell lines	Source
ES-E14TG2a mESC	ATCC: CRL-1821
Ago1-/- mESC	Liu et al, 2024
Ago2-/- mESC	Liu et al, 2024
let-7-/- mESC	This study
Ago1 3'UTR mutant mESC	This study

## Sheet: plasmids
Name	Description
pWH406	empty vector
pWH1070	mouse AGO2 overexpression vector
pWH1092	mouse Ago2_RNA_mutant(Y311A/F312A) expressing verctor
pWH1171	let-7a overexpression vector

## Sheet: oligoes
Name	Sequence	Description
oWH4792	TGAGGTAGTAGGTTGTATAGTT	qPCR oligo for let-7a
oWH4793	TGAGGTAGTAGGTTGTGTGGTT	qPCR oligo for let-7b
oWH4794	TGAGGTAGTAGGTTGTATGGTT	qPCR oligo for let-7c
oWH4795	AGAGGTAGTAGGTTGCATAGTT	qPCR oligo for let-7d
oWH4796	TGAGGTAGGAGGTTGTATAGTT	qPCR oligo for let-7e
oWH4797	TGAGGTAGTAGATTGTATAGTT	qPCR oligo for let-7f
oWH4798	TGAGGTAGTAGTTTGTACAGTT	qPCR oligo for let-7g
oWH4799	TGAGGTAGTAGTTTGTGCTGTT	qPCR oligo for let-7i
oWH4800	TGAGGTAGTAAGTTGTATTGTT	qPCR oligo for miR-98
oWH4873	TAGCAGCACGTAAATATTGGCG	qPCR oligo for miR-16
owH4803	aaagTgcTTccacTTTgTgTgc	qPCR oligo for miR-291
oWH4801	ACTCAAACTATGGGGGCACTTT	qPCR oligo for miR290a
oWH4802	AGTGCCGCAGAGTTTGTAGTGT	qPCR oligo for miR-293
oWH4872	TGTAAACATCCTCGACTGGAAG	qPCR oligo for miR-30
oWH4878	TGTATAGTTATCTCCTAAAC	sgRNA1 for knocking out let-7a-1
oWH4879	TTGTAATTCCGGTTTCCTGT	sgRNA2 for knocking out let-7a-1
oWH4884	TGTTTGGCCGCCATATTTGG	sgRNA1 for knocking out let-7c-1
oWH4885	CGATGGCTCAAGTGTGCTCC	sgRNA2 for knocking out let-7c-1
oWH4888	TCTTCATGCTGTTGCCTACT	sgRNA1 for knocking out let-7a-2
oWH4889	TTGAAAGGTAAGACTGAGTG	sgRNA2 for knocking out let-7a-2
oWH4938	agggaacagatgatagagtg	sgRNA1 for knocking out let-7f-2 and miR-98
oWH4939	atgtggccagctatttagaa	sgRNA2 for knocking out let-7f-2 and miR-98
oWH5056	GCACTGAGCGGCCTGTGTCG	sgRNA1 for knocking out let-7b and let-7c-2
oWH5057	ACGTCATAGCCCCCACCCAA	sgRNA2 for knocking out let-7b and let-7c-2
oWH4804	tactacctcagcctggaatc	sgRNA1 for knocking out let-7g
oWH4805	gctaccaaatggggtggaga	sgRNA2 for knocking out let-7g
oWH4808	GGCAGAAAGGAAACGTATGC	sgRNA1 for knocking out let-7d
oWH4809	AGTAGAAGACCAGCAAGAAT	sgRNA2 for knocking out let-7d
oWH4812	GAGCATCACCAGCACTAGCA	sgRNA1 for knocking out let-7i
oWH4813	GCGGACCACGCGGAGCGCAG	sgRNA2 for knocking out let-7i
oWH4816	TGCCCACCTGCCGCGCCCCC	sgRNA1 for knocking out let-7e
oWH4817	TGCACTGGAAGGGGCCGGCG	sgRNA2 for knocking out let-7e
oWH5437	GCAGAACGCTGTTACCTCAC	sgRNA for mutating the let-7 binding site in the 3'UTR of AGO1 mRNA
oWH5349	TGGTGGGTACTAGTGATGCCCCTTTTGGTCCAAGGGGGTCGGATATGACAAGATGGGGAGAGGGGTTGAGGACAATGAGGTTGCTATCAGTGATTTCTGGCTGGTAGTCTGTCTTGCTGGTCCTCTTCCCACCCTTATACCCCCTCTGTAGATAGAAACAAGGCCTCCTATACTCCTTCCGACCCCACCTCCCTCTGCCTTGCTTCCTCTGGATTTGGGTGGTACAGCTCCCAGGGCTTGGAAAGCTTTCTTCTATCCAGTCCGGACACAGCGTTCTGCCTTCAAGCGAAGTACATGGTGCGTAGAGTATCCTGGTGAACCTGCACAGCTTTGGCCAGGGCCTGGGGGTCTCGCCCATTGCTTTGCCCTGATATGTGGCTCCCCTCTCCACTGAAAAGA…	gblock donor to mutate the let-7 site in the 3’UTR of mouse Ago1 via sgRNA5347

## Sheet: antibodies
Antibodies	Vendor	Cat#
Rabbit monoclonal anti-Ago1 (D84G10)	Cell Signaling Technology	Cat# 5053
Rabbit monoclonal anti-Ago2 (C34C6)	Cell Signaling Technology	Cat# 2897
Mouse monoclonal anti-GAPDH (6C5)	Santa Cruz Biotechnology	Cat# sc-32233
Rabbit monoclonal anti-Lin28A (D1A1A)	Cell Signaling Technology	Cat# 8641
Rabbit anti-Nanog (D2A3)	Cell Signaling Technology	Cat# 8822
Mouse anti-Oct-4	BD Transduction Laboratories™	Cat# 611202
